# Supplementary material for: Immunological landscape of human lymphoid explants during measles virus infection
Source: PubMed Central journal article supplement (PMC11385098; doi:10.1172/jci.insight.172261), 2024-07-25
Supplement: jciinsight-9-172261-s119.pdf [file jciinsight-9-172261-s119.pdf]

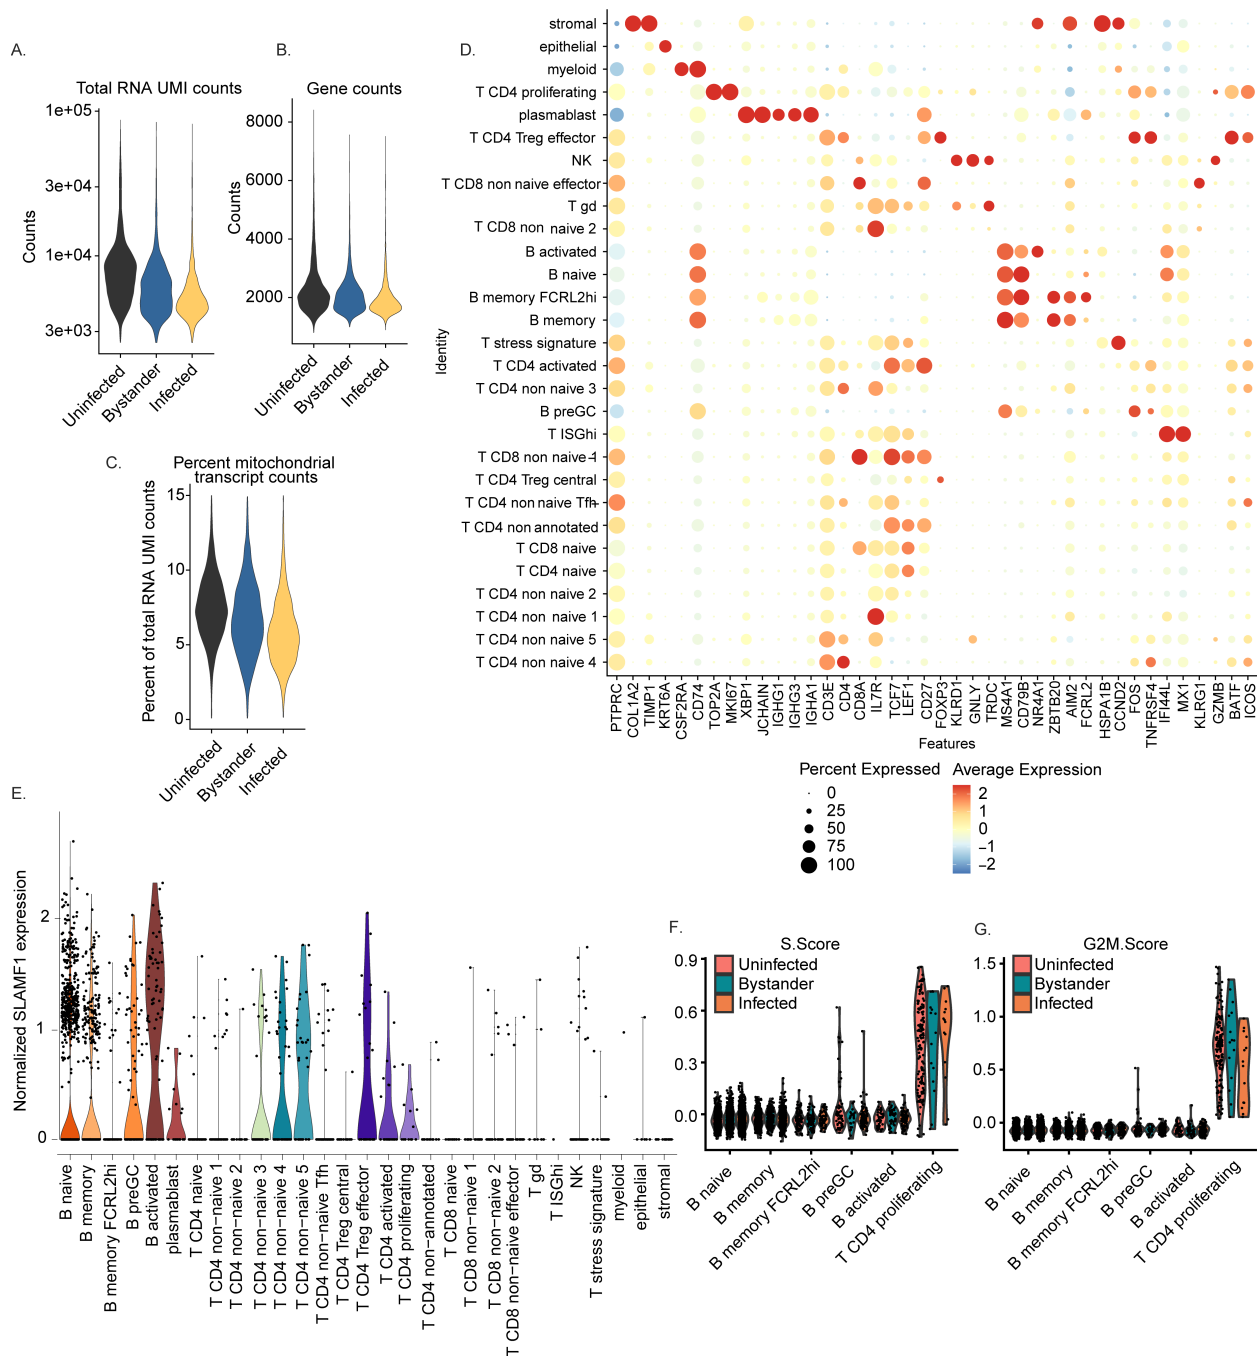

952  
 953 **Figure S1 (related to Figure 2): Cluster annotation strategy for scRNA-Seq.** Total counts of  
 954 unique molecular identifiers (UMI; **A**), individual genes (**B**), and mitochondrial transcripts (**C**) were  
 955 quantified for quality control and filtering. Dot plot showing the expression of cluster-defining  
 956 features across each identified cell cluster. Average expression (Z scaled) is shown for each  
 957 feature by color, while the percentage of cells in each cluster expressing that feature is shown by  
 958 the size of the dot (**D**). Normalized SLAMF1 expression across all cell types was determined (**E**).  
 959 Pathway scores for S phase (**F**) and G2M (**G**) were calculated and compared across B cell  
 960 subsets and proliferating CD4 T cells.

961  
 962

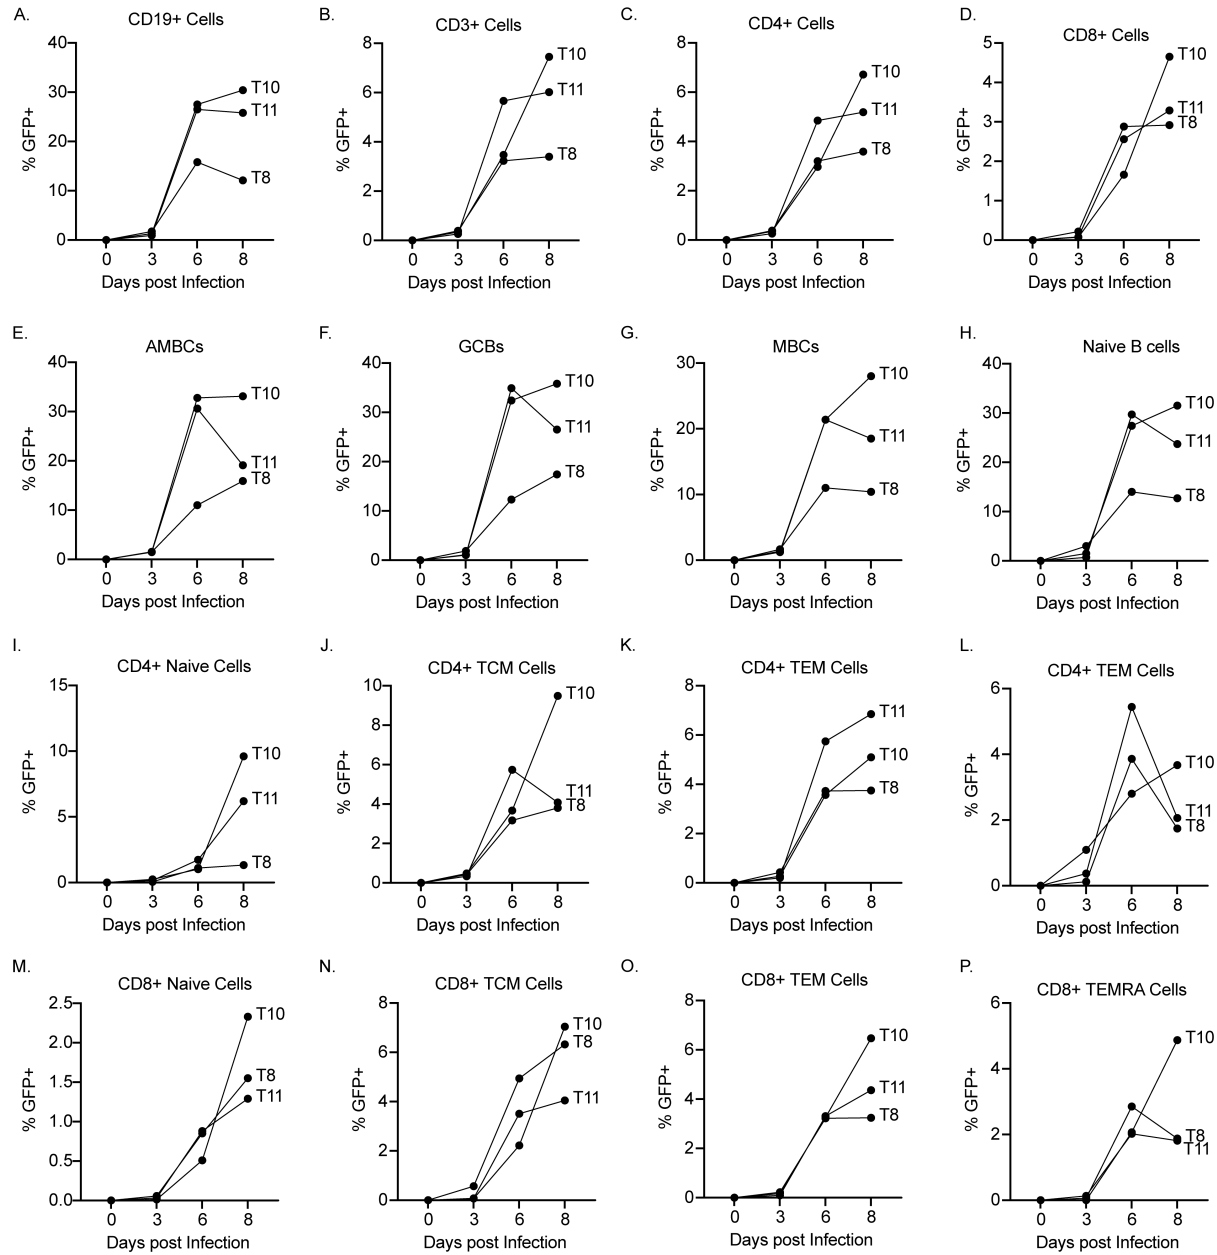

963  
 964  
 965  
 966  
 967  
 968  
 969  
 970  
 971  
 972  
 973  
 974

**Figure S2 (Related to Figure 3): Quantification of infection kinetics in different cell populations.** Secondary analysis of donors from Figure 3. The percentage of GFP<sup>+</sup> cells within each cell type identified in the explants is quantified for B and T cells (A-B), CD4<sup>+</sup> and CD8<sup>+</sup> cells (C-D), B cell subsets (E-H), CD4<sup>+</sup> T cell subsets (I-L) and CD8<sup>+</sup> T cell subsets (M-P). Each dot/line represents a single donor.

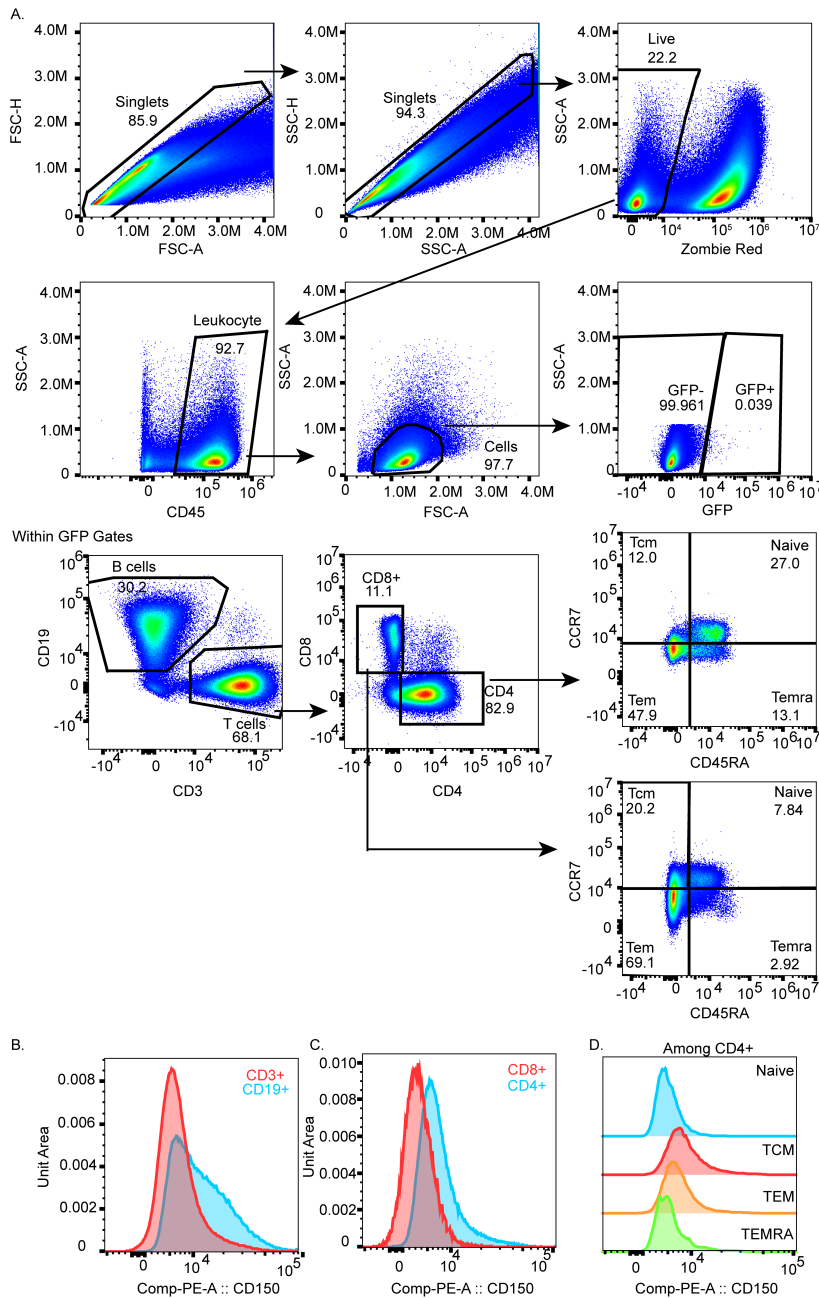

975 **Figure S3 (Related to Figure 3). Gating schemata for flow cytometry-based**  
 976 **immunophenotyping experiments.** Representative flow plots are shown for one uninfected  
 977 donor. Single cells are selected, followed by dead cell exclusion, gating upon CD45<sup>+</sup> cells, cell  
 978 gating, and then binning cells based on GFP status **(A)**. Within GFP<sup>+</sup> or GFP<sup>-</sup> gates, cells are  
 979 further phenotyped based on CD3/CD19 (B vs T cells), CD4 vs CD8 lineages within the CD3<sup>+</sup>  
 980 gate, and then memory subsets within these lineages. Histograms demonstrating CD150  
 981 expression are compared between CD3<sup>+</sup> and CD19<sup>+</sup> cells **(B)**, between CD4<sup>+</sup> and CD8<sup>+</sup>  
 982 cells **(C)**, or between CD4<sup>+</sup> **(D)** or CD8<sup>+</sup> **(E)** memory subsets for one representative donor in the day 6  
 983 uninfected condition.

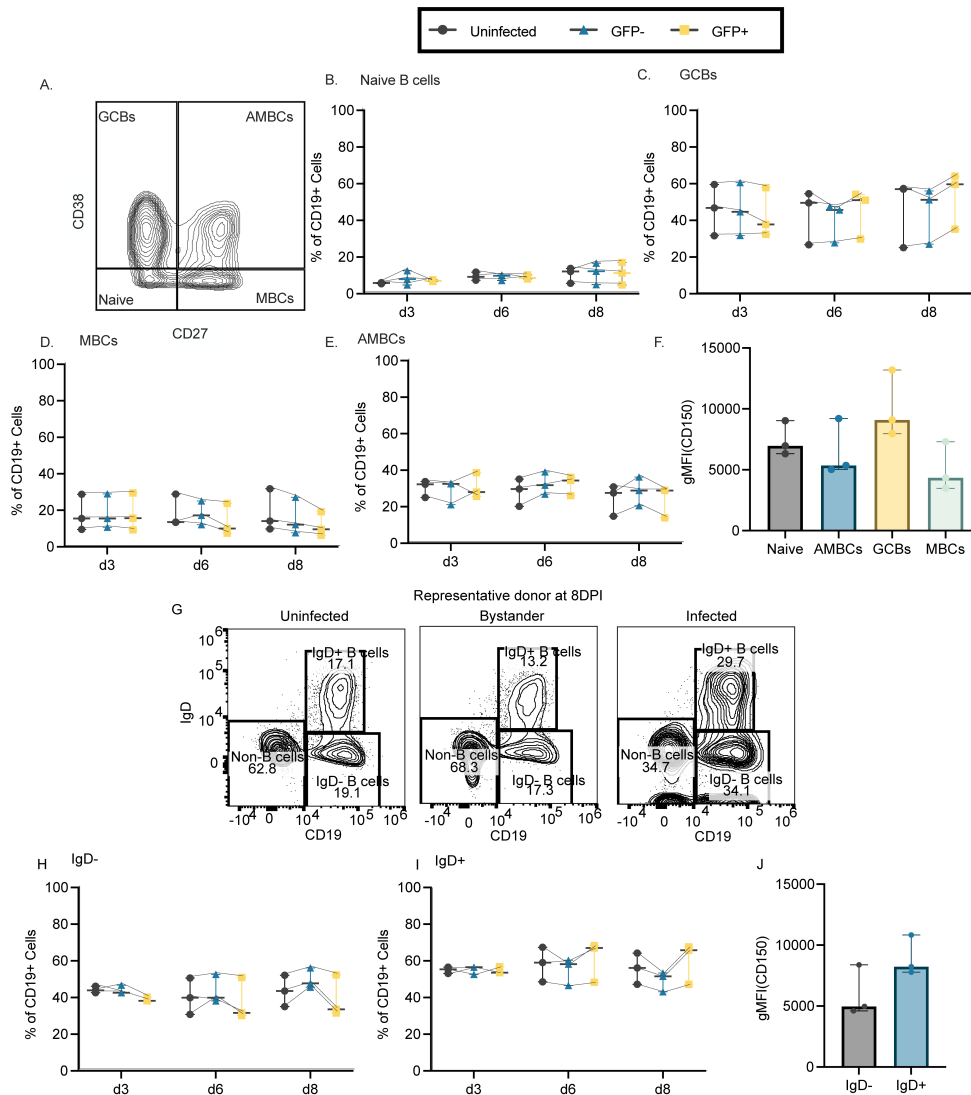

984 **Figure S4 (related to Figure 3): MeV infects B cell subsets proportionally.** Donors (n=3) from  
 985 Figure 3 were immunophenotyped to identify B cell subsets using CD38 and CD27 within the  
 986 CD19<sup>+</sup> cells, with the gating strategy utilized shown in (A). Naive (CD27<sup>-</sup>CD38<sup>-</sup>; B), germinal  
 987 center (CD27<sup>-</sup>CD38<sup>+</sup>; C), memory (CD27<sup>+</sup>CD38<sup>-</sup>; D), and activated memory (CD27<sup>+</sup>CD38<sup>+</sup>; E) B  
 988 cells were quantified by comparing their frequency among both uninfected and GFP<sup>+</sup> cells over  
 989 time. CD150 expression was calculated for each population among uninfected cells at 6 days  
 990 post-infection and the mean fluorescent intensity (MFI) of CD150 expression is shown (F).  
 991 Representative flow plots are shown demonstrating the enrichment of IgD<sup>+</sup> B cells among all  
 992 infected cells at 8DPI (G). Susceptibility to infection was assessed by quantifying the frequency  
 993 of IgD<sup>-</sup> (H) or IgD<sup>+</sup> (I) cells among uninfected, bystander, or infected cells. CD150 expression on  
 994 IgD<sup>-</sup> and IgD<sup>+</sup> populations at day 6 are shown in (J). For all immunophenotyping panels,  
 995 significance was determined by two-way ANOVA using the Geisser-Greenhouse correction with  
 996 Tukey's multiple comparison test. For panel (F) significance was determined by one-way ANOVA  
 997 using Friedman's test with Dunnett's multiple comparison test. Significance in (J) was determined  
 998 using the Wilcoxon matched-pairs signed rank test. For all plots, the median with the 95%  
 999 confidence interval is shown.

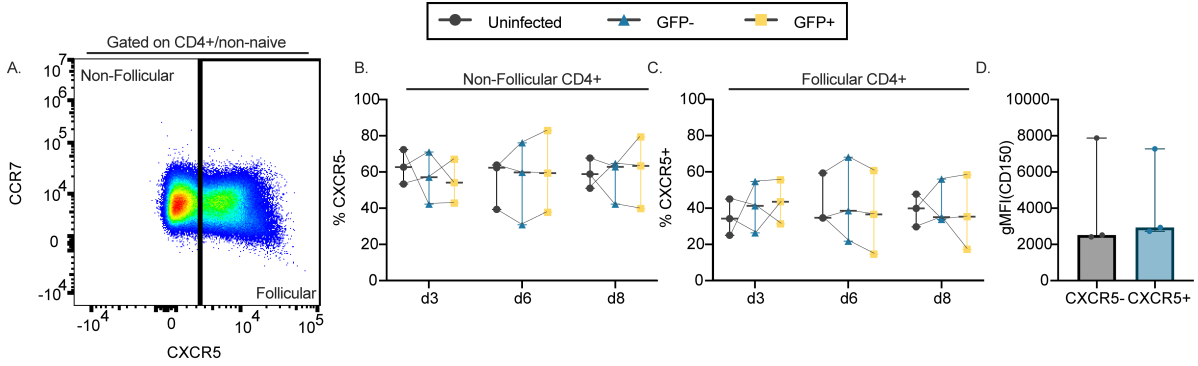

1000  
 1001  
 1002  
 1003  
 1004  
 1005  
 1006  
 1007  
 1008  
 1009

**Figure S5 (related to Figure 3): CXCR5 status has no impact on the susceptibility of CD4<sup>+</sup> cells.** Non-Naïve CD4<sup>+</sup> cells (n=3) were subset based on CXCR5 status as shown in (A). Shown are the frequency of non-follicular (CXCR5<sup>-</sup>; B) and follicular (CXCR5<sup>+</sup>; C) cells among uninfected, GFP<sup>-</sup> (bystander), or GFP<sup>+</sup> non-naïve CD4<sup>+</sup> cells. CD150 expression was compared between non-follicular and follicular cells (D). Significance for B-C was determined by two-way ANOVA using the Geisser-Greenhouse correction with Tukey's multiple comparison test, and CD150 expression significance was determined by the Wilcoxon matched-pairs signed rank test (D). For all plots, the median with the 95% confidence interval are shown.

A.

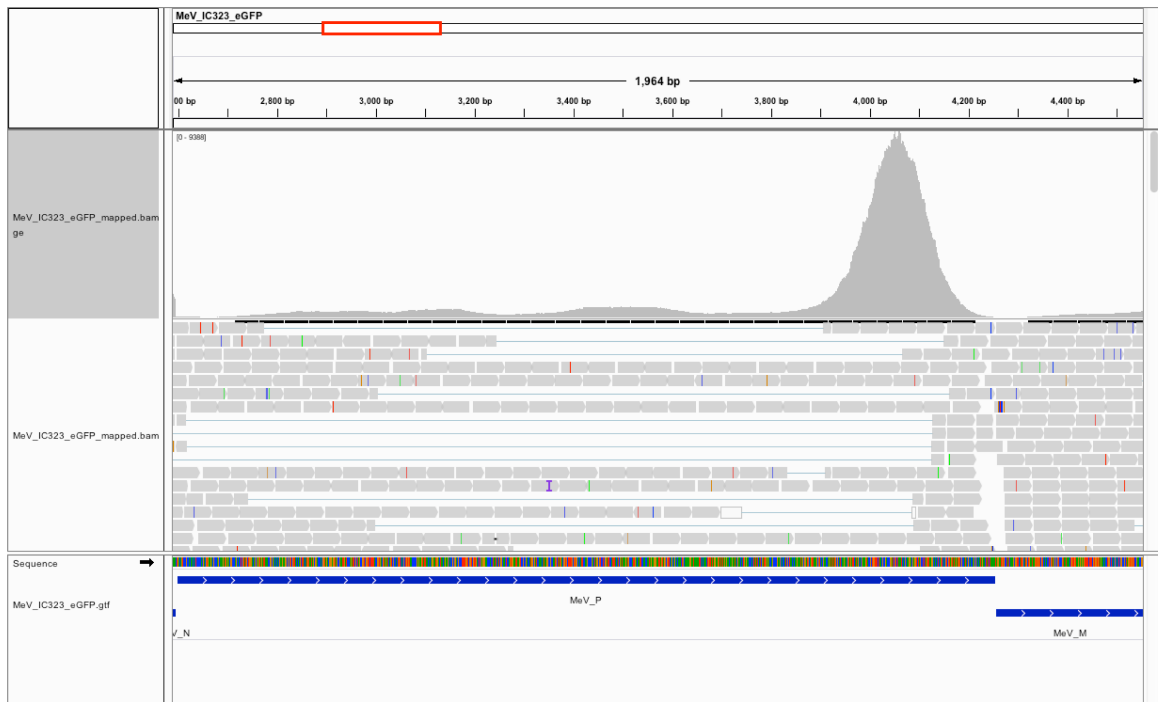

B.

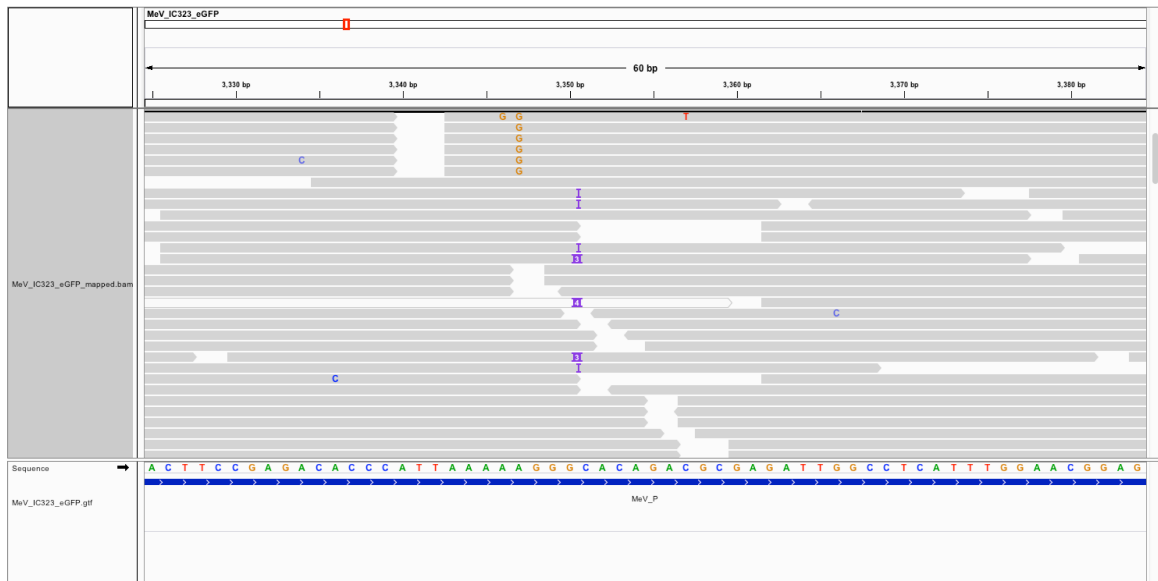

1010  
1011  
1012  
1013  
1014  
1015  
1016  
1017  
1018

**Figure S6 (related to Figures 2 and 4): Detection of P-editing by scRNA-Seq. (A)** Read coverage for all libraries along the length of the MeV P transcript. The red box denotes the region of the MeV linear genome that is shown in the histogram box, and the boxes under the histogram are a selection of reads that map to these positions. Gray bars indicate that the read matches the reference sequence, with colored letters representing mismatches to the reference. **(B)** Zoomed-in coverage of the p-edited region, showing representative reads that map to this region of the gene in gray. “I” represents indel mappings, which may indicate P-edited transcripts. There were 235 total reads covering the putative edit site.

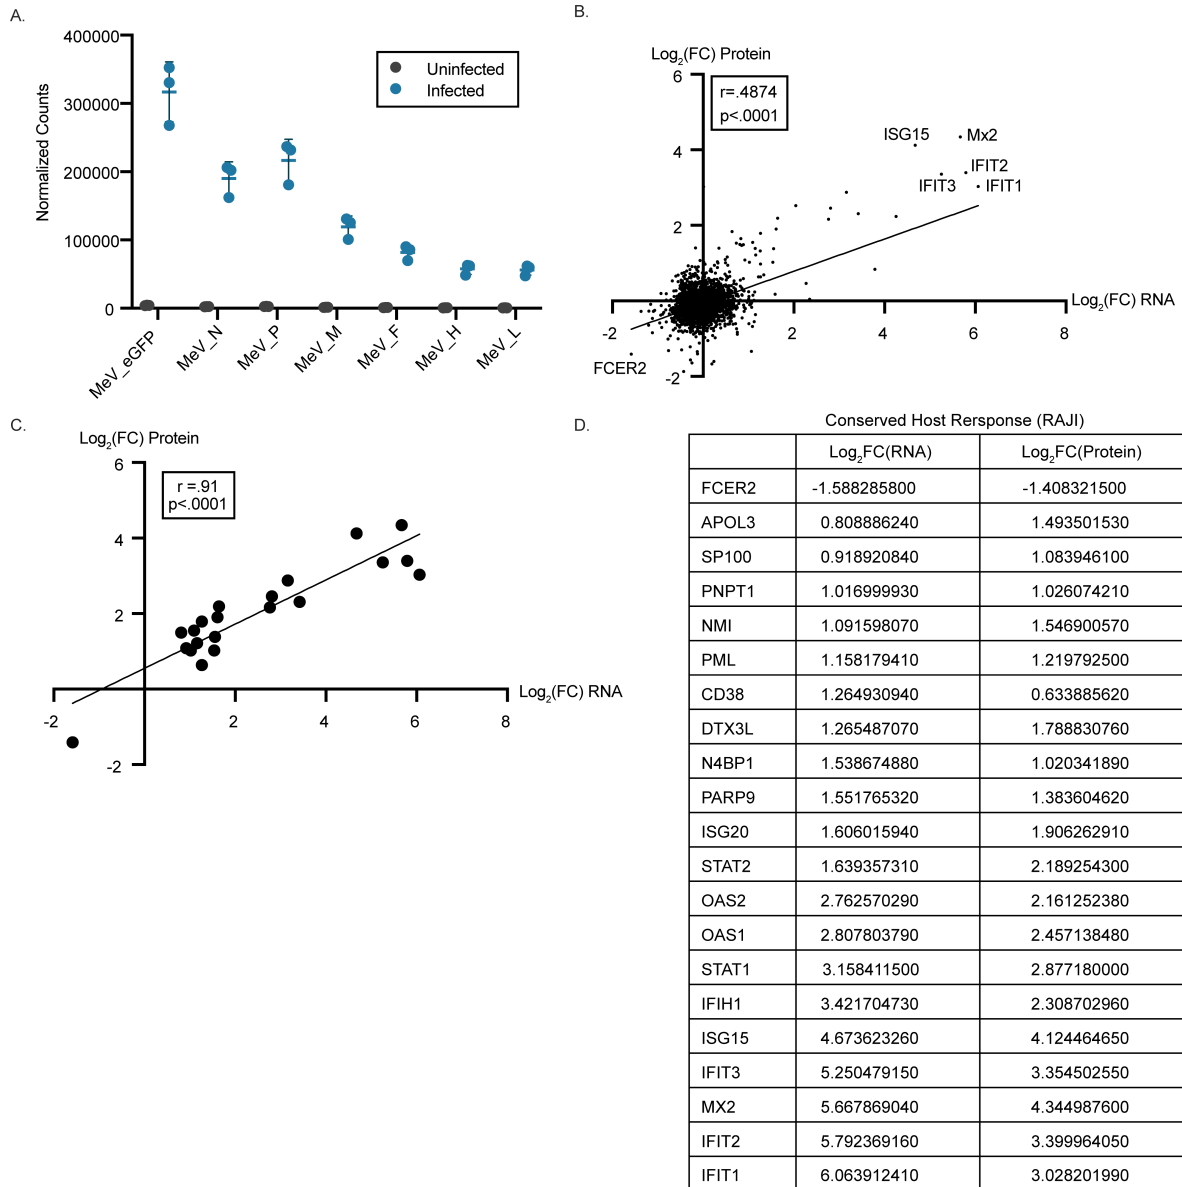

1019  
 1020  
 1021  
 1022  
 1023  
 1024  
 1025  
 1026  
 1027  
 1028  
 1029  
 1030  
 1031

**Figure S7 (Related to Figure 5). Comparison of the transcriptome and proteome in infected Raji cells.** Raji cells were infected with MeV and collected for bulk RNA sequencing (n=3). **(A)** Detection of MeV transcripts in infected cells is shown as normalized counts for each MeV gene compared to uninfected controls. Median and 95% confidence intervals are shown. **(B)** Correlation plot showing the relationship between differentially expressed proteins (y-axis) identified by MS in Figure 5 with differentially expressed transcripts identified by bulk RNA sequencing (x-axis). Log<sub>2</sub>FC values for transcripts and proteins that were detected in both RNA and protein assays are shown. Simple linear regression was conducted, and the Pearson correlation value was reported on the plot, along with the significance of the correlation. **(C)** Correlation plot demonstrating the relationship between the list of significantly altered proteins (y-axis) and transcripts (x-axis). Hits that were significant in both assays are denoted in the table shown in **(D)**.
