# Supplementary material for: Immunological landscape of human lymphoid explants during measles virus infection
Source: PubMed Central journal article supplement (PMC11385098; doi:10.1172/jci.insight.172261), 2024-07-25

# Full unedited gel for Figure 5D

- 1. Uninfected 1
- 2. Uninfected 2
- 3. Uninfected 3
- 4. Infected 1
- 5. Infected 2
- 6. Infected 3

## Primary Antibodies

- 1. Mouse anti-human IFIT3 (1:1000)
- 2. Rabbit anti-human ISG15 (1:5000)
- 3. Mouse anti-human b-Actin (1:1000)
- 4. Mouse anti-GFP (1:1000)

## Secondary Antibodies

- 1. Goat anti-mouse HRP (1:10000)
- 2. Goat anti-rabbit HRP (1:10000)
- 3. Goat anti-mouse AlexaFluor 647 (1:2000)

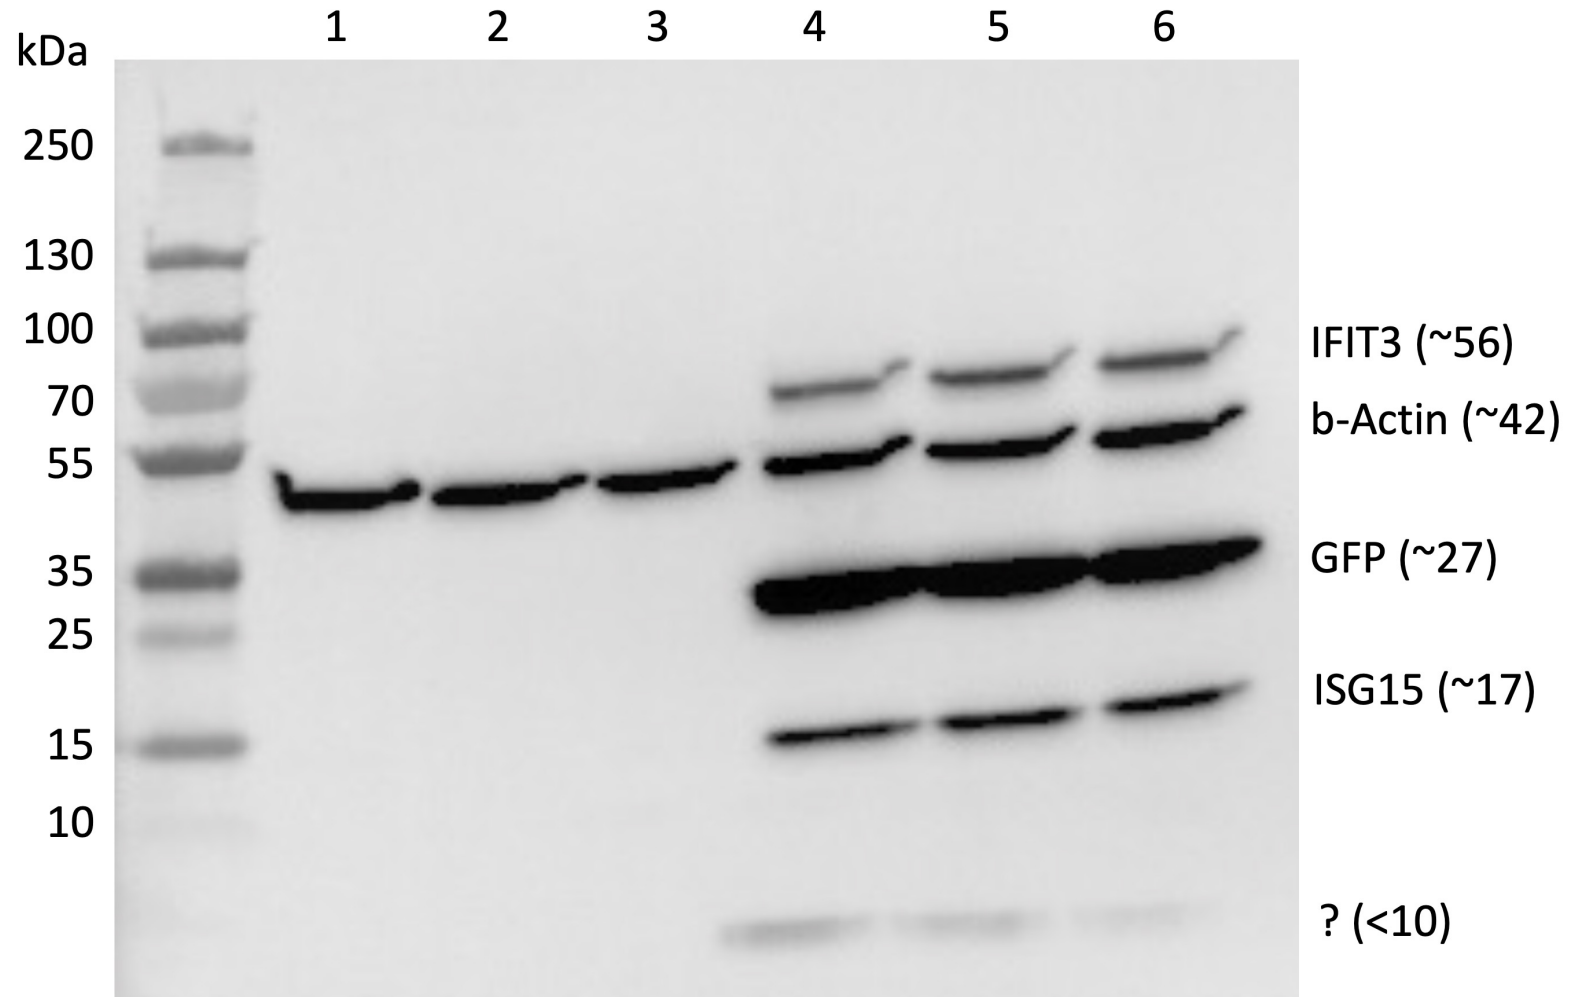

Supplement: jciinsight-9-172261-s120.pdf [file jciinsight-9-172261-s120.pdf]
